# Supplementary material for: Identification of circulating proteins associated with general cognitive function among middle-aged and older adults
Source: PubMed Central journal article supplement (PMC10624811; doi:10.1038/s42003-023-05454-1), 2023-11-03
Supplement: 42003_2023_5454_MOESM3_ESM.pdf [file 42003_2023_5454_MOESM3_ESM.pdf]

## Description of Additional Supplementary Files

**File name:** Supplementary Data 1

**Description:** Characteristics of the discovery cohorts.

**File name:** Supplementary Data 2

**Description:** Protein assay platforms among discovery and replication cohorts.

**File name:** Supplementary Data 3

**Description:** Characteristics of replication cohorts using the SomaScan platform.

**File name:** Supplementary Data 4

**Description:** Characteristics of replication cohorts using the Olink platform.

**File name:** Supplementary Data 5

**Description:** Pearson correlations between cognitive scores used in generating general cognitive function in the discovery cohorts.

**File name:** Supplementary Data 6

**Description:** Variance explained by the first unrotated principal component (PC1) for the input cognitive scores.

**File name:** Supplementary Data 7

**Description:** Summary statistics of general cognitive function represented by the first unrotated principal component (PC1) of cognitive scores from  $\geq 3$  different domains.

**File name:** Supplementary Data 8

**Description:** Bonferroni-corrected significance thresholds in analyses.

**File name:** Supplementary Data 9

**Description:** Circulating proteins that were significant in the discovery meta-analyses.

**File name:** Supplementary Data 10

**Description:** DSST summary statistics from discovery and replication cohorts.

**File name:** Supplementary Data 11

**Description:** Correlations between betas from each discovery cohort for the proteins that were significant in the discovery analysis.

**File name:** Supplementary Data 12

**Description:** Protein measures that were significantly associated with general cognitive function in the discovery study and were also associated with related outcomes.

**File name:** Supplementary Data 13

**Description:** SNPs that had  $p < 5e-8$  in the GWAS of general cognitive function in Davies et al. 2018 and were near the promoter (500kb on both sides) on the encoding gene of a protein that were significantly associated with general cognitive function in the discovery study.

**File name:** Supplementary Data 14

**Description:** Among the 246 protein measures that were significant in at least one of the discovery meta-analysis, Spearman correlations between measures from SomaScan and Olink for 99 proteins were available from Pretzner et al. Nat Comms 2019.

**File name:** Supplementary Data 15

**Description:** Proteins replicated at  $FDR < 0.05$  for general cognitive function among aged  $\geq 25$  in SomaScan replication analysis.

**File name:** Supplementary Data 16

**Description:** Proteins replicated at  $FDR < 0.05$  for general cognitive function among aged  $\geq 65$  in SomaScan replication analysis.

**File name:** Supplementary Data 17

**Description:** Proteins replicated at  $FDR < 0.05$  for DSST among aged  $\geq 65$  in SomaScan replication analysis.

**File name:** Supplementary Data 18

**Description:** Olink replication results.

**File name:** Supplementary Data 19

**Description:** Association between circulating proteins and general cognitive function among participants aged  $\geq 65$  with the addition of eGFR as covariates.

**File name:** Supplementary Data 20

**Description:** Association between circulating proteins and DSST among participants aged  $\geq 65$  with the addition of eGFR as covariates.

**File name:** Supplementary Data 21

**Description:** GO gene sets over-represented for cognition-associated proteins based on the discovery meta-analysis of general cognitive function among participants aged  $\geq 25$ .

**File name:** Supplementary Data 22

**Description:** GO gene sets over-represented for cognition-associated proteins based on the discovery meta-analysis of general cognitive function among participants aged  $\geq 65$ .

**File name:** Supplementary Data 23

**Description:** GO Gene sets enriched in the two tails of the effect size distribution of the discovery meta-analysis results of general cognitive function among participants aged  $\geq 65$ .

**File name:** Supplementary Data 24

**Description:** GO Gene sets enriched in the two tails of the effect size distribution of the discovery meta-analysis results of DSST among participants aged  $\geq 65$ .

**File name:** Supplementary Data 25

**Description:** Proteins with significant effect on general cognitive function based on the primary methods of Mendelian randomization (MR) analysis using GWAS summary statistics from Davies et al. 2018.

**File name:** Supplementary Data 26

**Description:** Heterogeneity of protein proxy SNPs used in forward MR in the meta-analysis of pQTLs.

**File name:** Supplementary Data 27

**Description:** Lookup of significant associations between the proxy SNPs of proteins implicated as affecting general cognitive function with the expression of nearby genes in GTEx 8.0.

**File name:** Supplementary Data 28

**Description:** Posterior Probabilities from colocalization analysis of protein and outcome significant in forward MR analysis on AD and general cognitive function.

**File name:** Supplementary Data 29

**Description:** Proteins implicated as consequences of general cognitive function: results from Mendelian randomization (MR) analysis using GWAS summary statistics from Davies et al. 2018.

**File name:** Supplementary Data 30

**Description:** Heterogeneity of proxy SNPs of general cognitive function or AD used in reverse MR in the meta-analysis of the pQTLs.

**File name:** Supplementary Data 31

**Description:** The protein with significant effect on AD susceptibility from Mendelian randomization (MR) analysis using three AD GWAS datasets. The proxy SNP was rs440277 and the MR method was Wald ratio.

**File name:** Supplementary Data 32

**Description:** Results of the lookup for significant association of gene expression of cis-genes of the proxy SNP of NECTIN2 (rs440277) in GTEx version 8.0.

**File name:** Supplementary Data 33

**Description:** Effect of SVEP1 on AD susceptibility from Mendelian randomization analysis.

**File name:** Supplementary Data 34

**Description:** Lead SNP pairs from the colocalization analysis using SuSIE for NECTIN2 and Alzheimer disease (AD).

**File name:** Supplementary Data 35

**Description:** Proteins implicated as consequences of AD susceptibility: results from primary methods of Mendelian randomization (MR) analysis using GWAS summary statistics of Kunkle et al. 2019 along with assessment of heterogeneity and pleiotropy based on Egger intercept.

**File name:** Supplementary Data 36

**Description:** Proteins implicated as consequences of AD: results from primary and secondary methods using GWAS summary statistics of AD (Kunkle et al. 2019).

**File name:** Supplementary Data 37

**Description:** Correlation between proteins that were significantly implicated as affected by AD susceptibility.

**File name:** Supplementary Data 38

**Description:** Proteins implicated as consequences of AD susceptibility: results from primary methods using GWAS summary statistics of Jansen et al. 2019 along with assessment of heterogeneity and pleiotropy based on Egger intercept.

**File name:** Supplementary Data 39

**Description:** Proteins implicated as consequences of AD susceptibility: results from primary and secondary methods using GWAS summary statistics of Jansen et al. 2019.

**File name:** Supplementary Data 40

**Description:** Association between APOE4 carrier status and proteins implicated as consequence of AD susceptibility.

**File name:** Supplementary Data 41

**Description:** Association between APOE  $\epsilon$ 4 risk variants and C-reactive protein in GWAS studies that included UK Bank. These results were obtained from the GWAS catalog.
